# Supplementary material for: Biobanked Glioblastoma Patient-Derived Organoids as a Precision Medicine Model to Study Inhibition of Invasion
Source: MDPI journal article supplement (doi:10.3390/ijms221910720), 2021-10-03

FigureS1\_Compound structures and molecular weights

| Compound | MW     | Compound structure                                                                  |
|----------|--------|-------------------------------------------------------------------------------------|
| BS-1-28  | 407.46 | 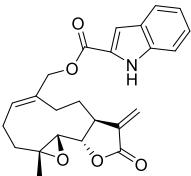   |
| BS-2-04  | 433.49 |    |
| BS-4-60  | 421.48 |    |
| BSK-1-97 | 603.69 |    |
| BSK-2-17 | 657.74 |   |
| BSK-2-26 | 604.12 |  |
| JVM-3-55 | 554.62 |  |
| JVM-3-62 | 724.88 |  |
| JVM-4-25 | 425.91 |  |

|                 |        |                                                                                      |
|-----------------|--------|--------------------------------------------------------------------------------------|
| <b>JVM-4-26</b> | 409.45 | 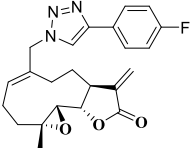    |
| <b>PNR-4-44</b> | 334.37 |    |
| <b>PNR-4-48</b> | 335.35 |    |
| <b>PNR-5-02</b> | 351.42 |     |
| <b>PNR-5-82</b> | 375.44 |     |
| <b>PNR-5-85</b> | 400.45 |    |
| <b>PNR-5-88</b> | 433.48 |  |
| <b>PNR-7-74</b> | 367.42 |   |
| <b>PNR-7-84</b> | 304.34 |  |
| <b>ST-145</b>   | 341.36 |  |

|                  |        |                                                                                    |
|------------------|--------|------------------------------------------------------------------------------------|
| <b>ST-145(B)</b> | 357.36 | 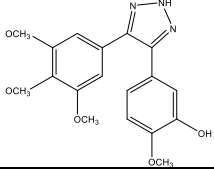 |
| <b>ST-148</b>    | 325.35 |  |
| <b>ST-467</b>    | 341.36 |  |

Figure S2\_ Standard curve for interpolation of percentage of viability for (a) BS, (c) BSK, (e) JVM, (g) PNR and (i) ST and of live cell number for (b) BS, (d) BSK, (f) JVM, (h) PNR and (j) ST

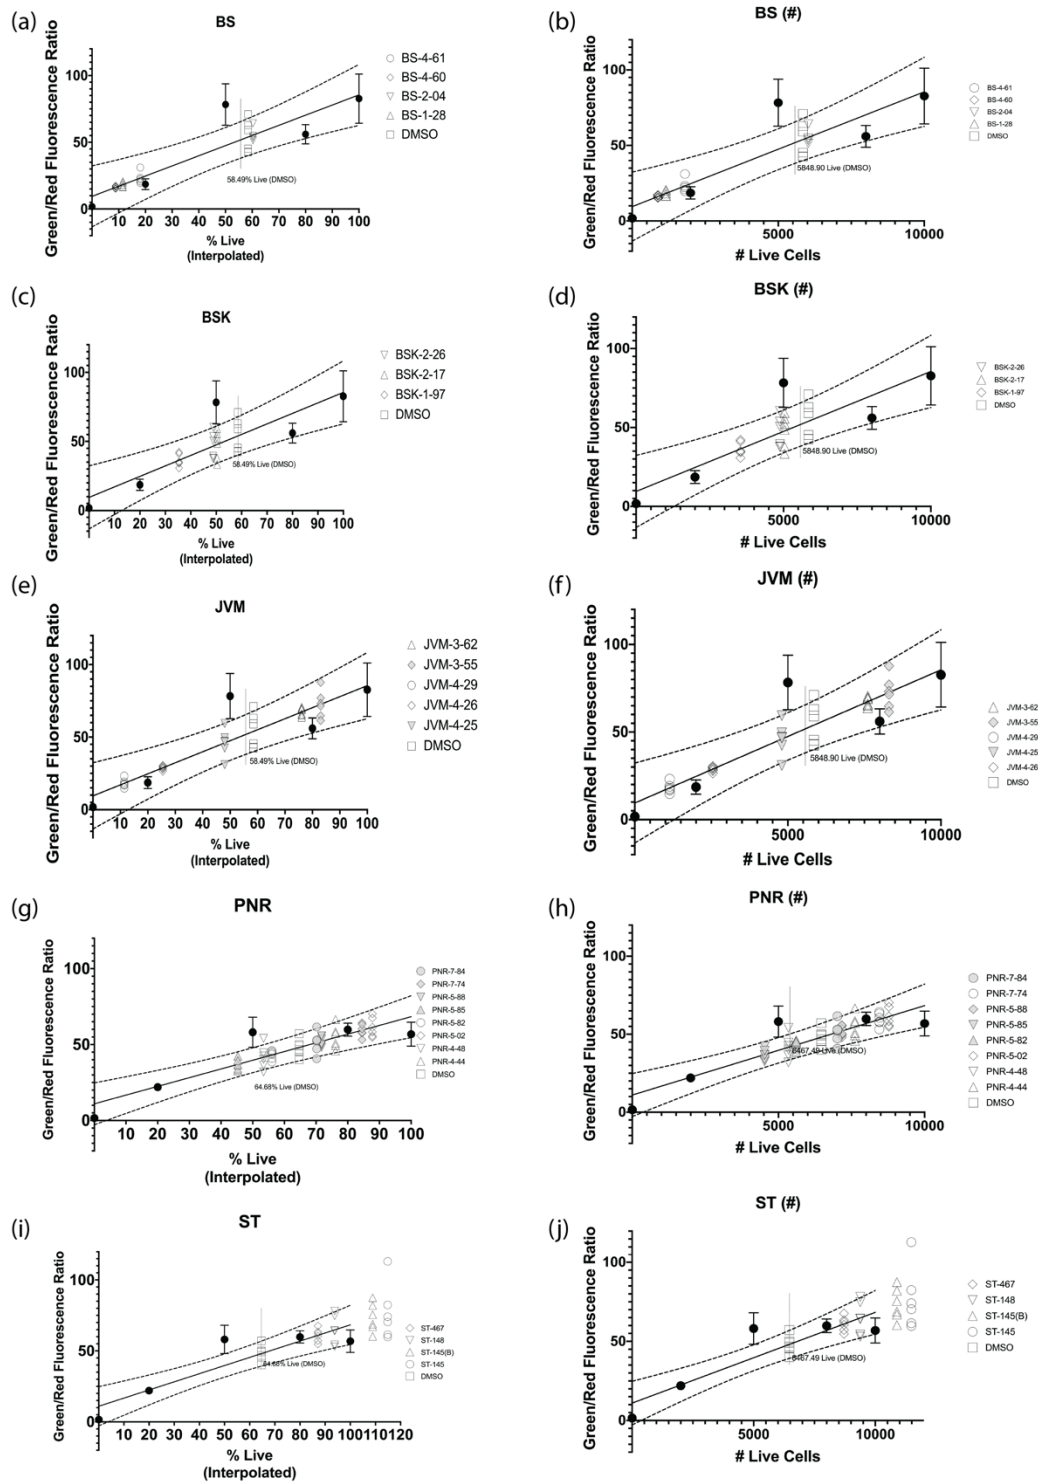

Supplement: s1 [file s1]
